# Supplementary material
Source: PubMed Central journal article supplement (PMC10112048)

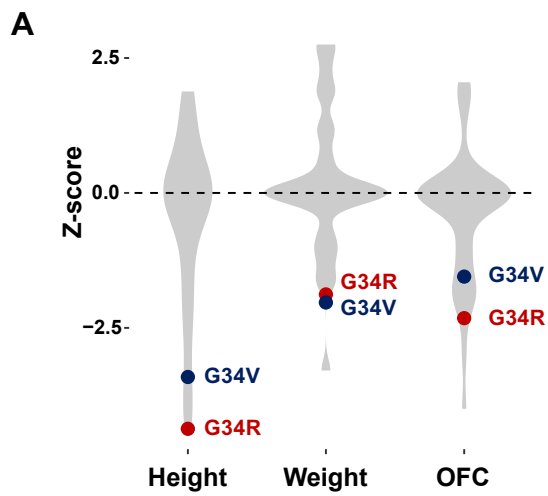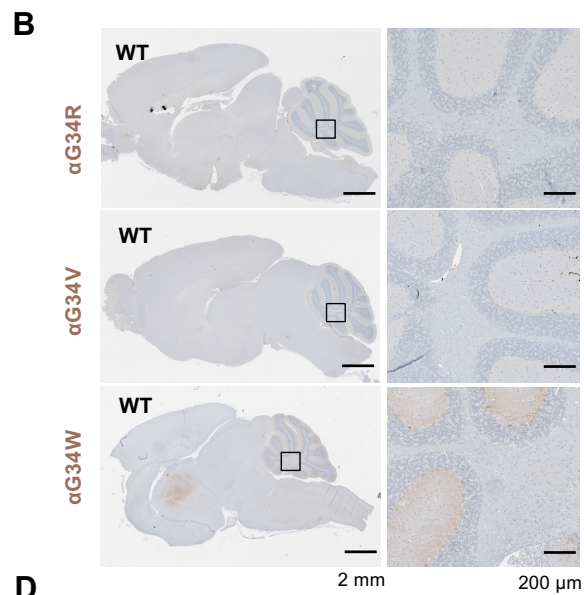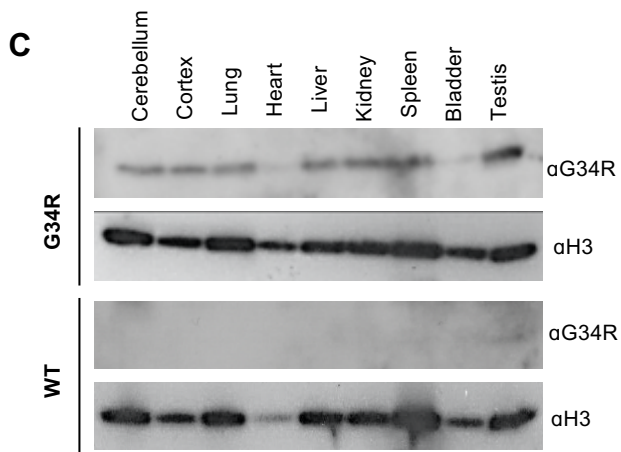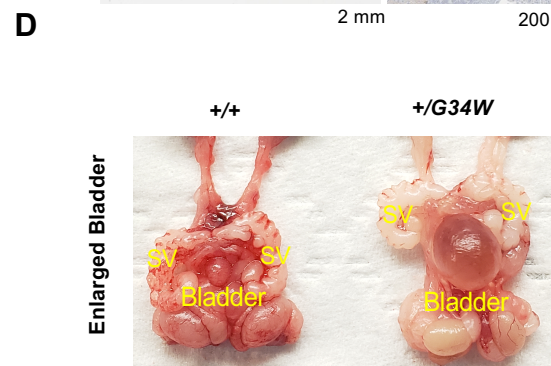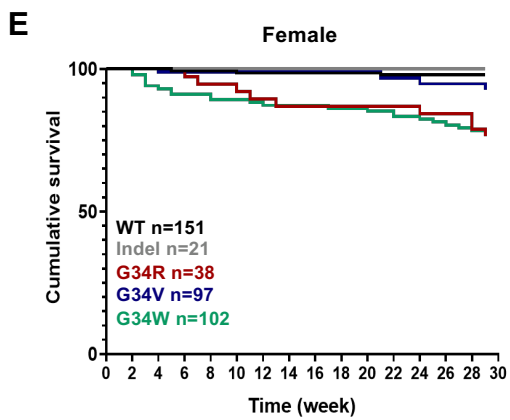

Supplement: NIHMS1878535-supplement-1.pdf [file NIHMS1878535-supplement-1.pdf]

**A**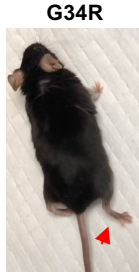**B**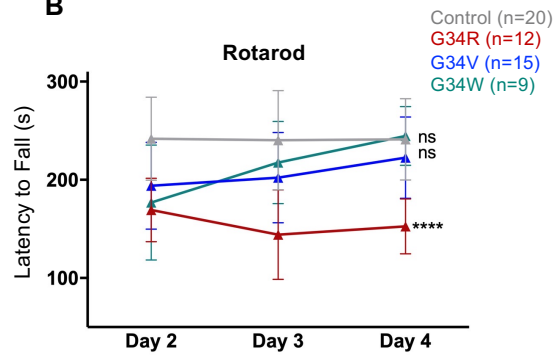**C**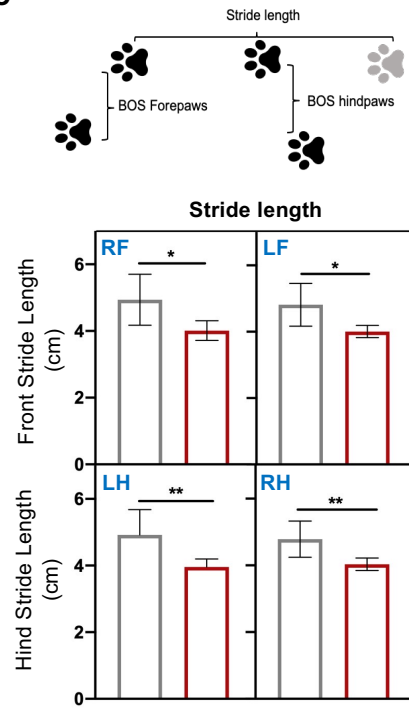**D**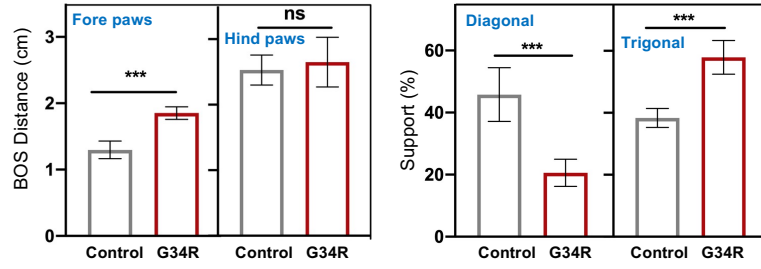**E**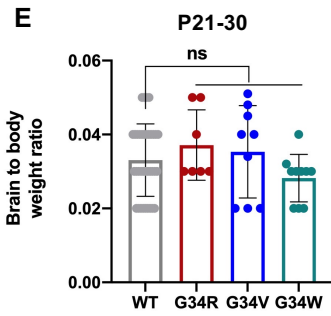**F**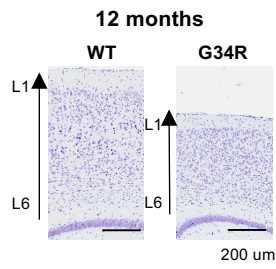**G**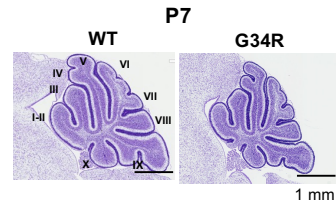**H**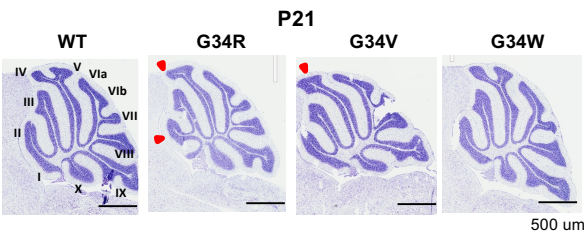**I**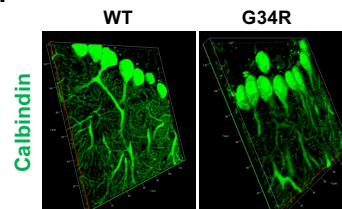

Supplement: NIHMS1878535-supplement-2.pdf [file NIHMS1878535-supplement-2.pdf]

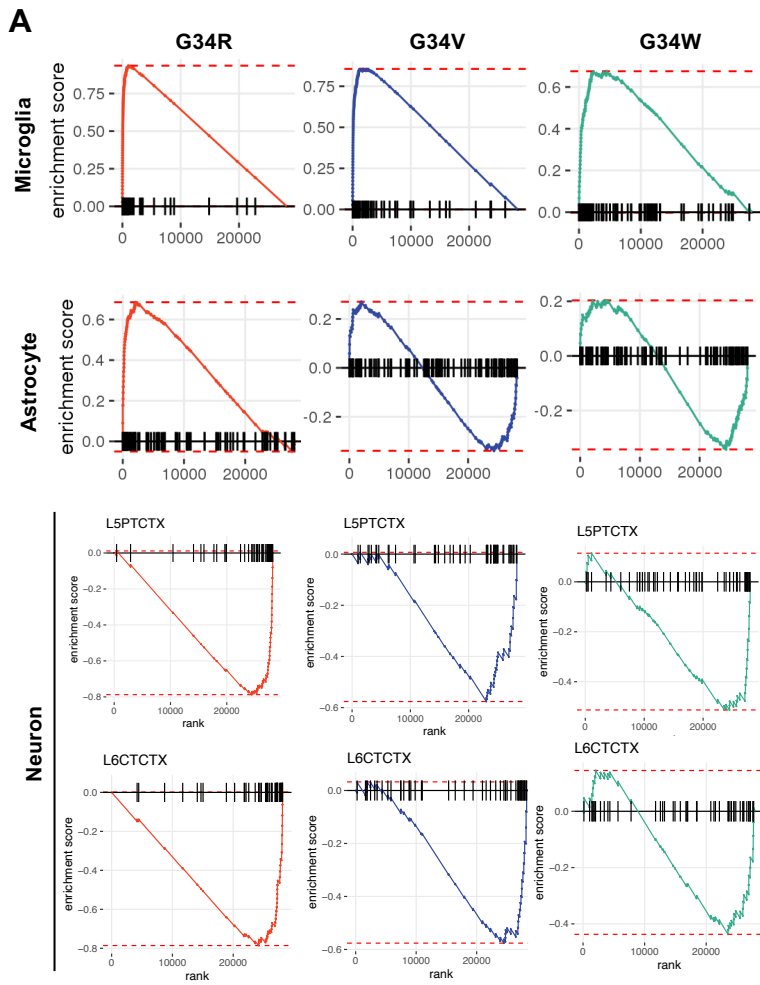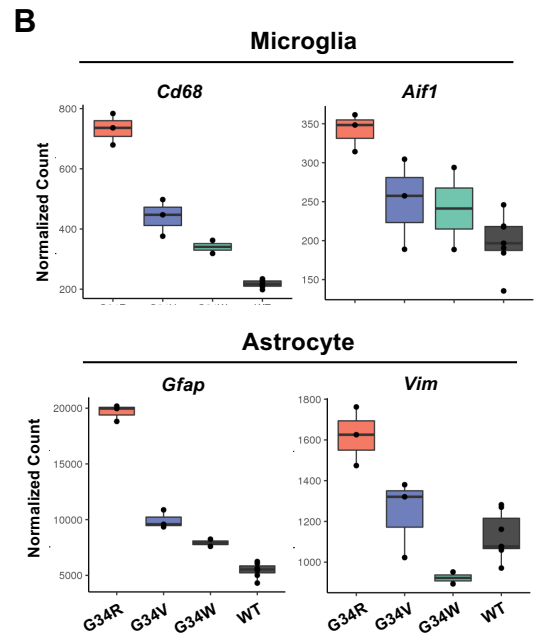

**C** Quantification related to Fig. 3D

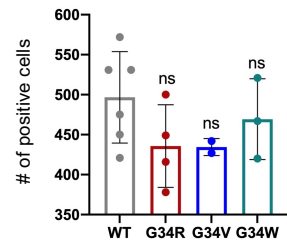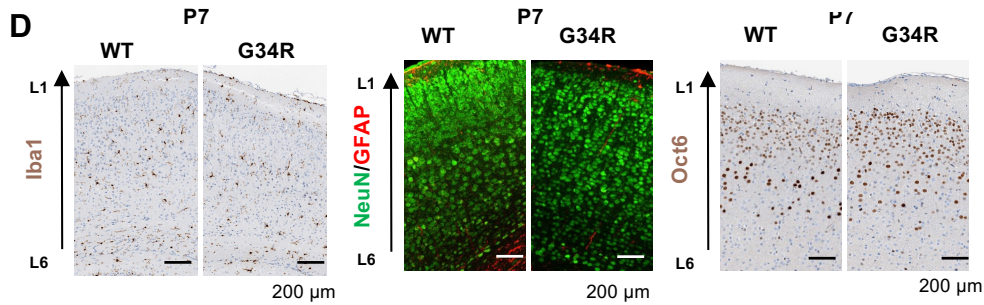

Supplement: NIHMS1878535-supplement-3.pdf [file NIHMS1878535-supplement-3.pdf]

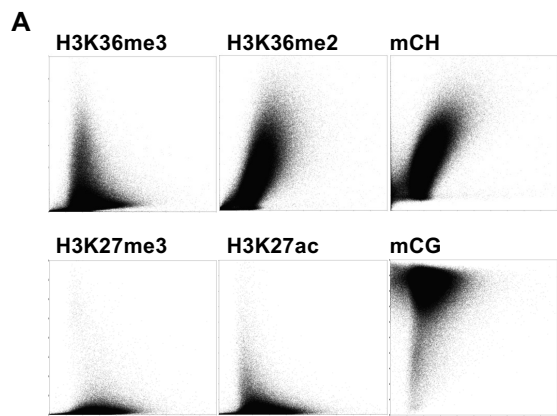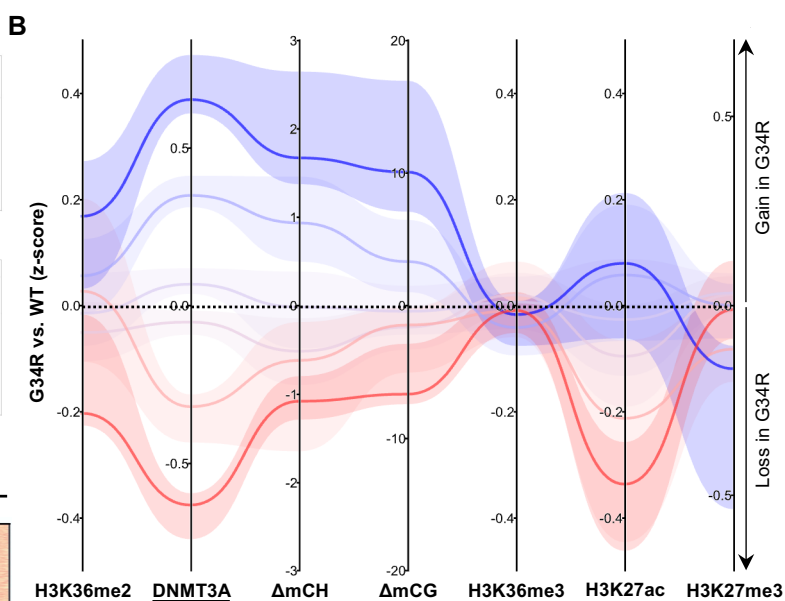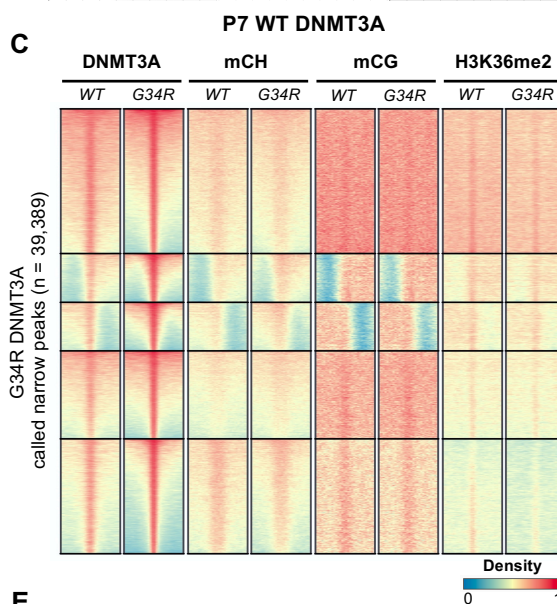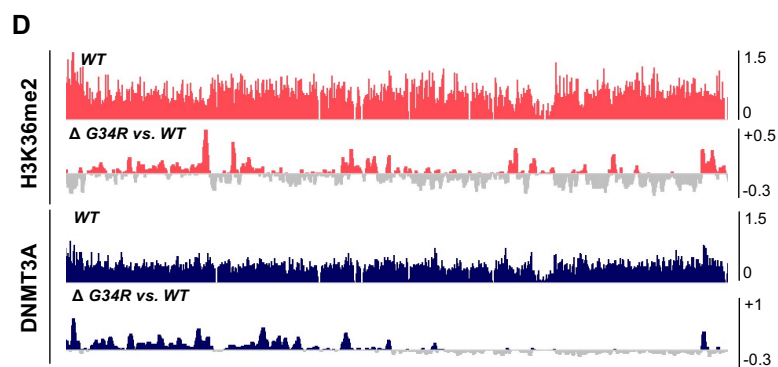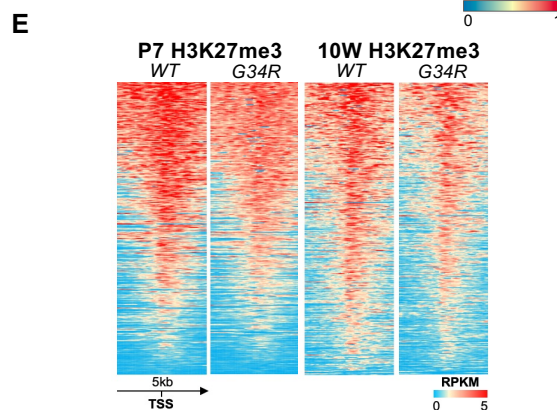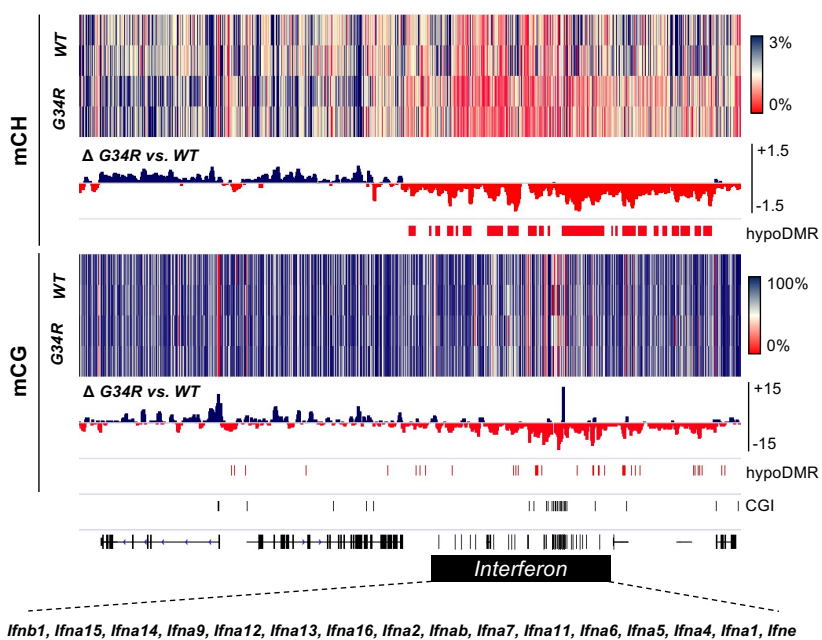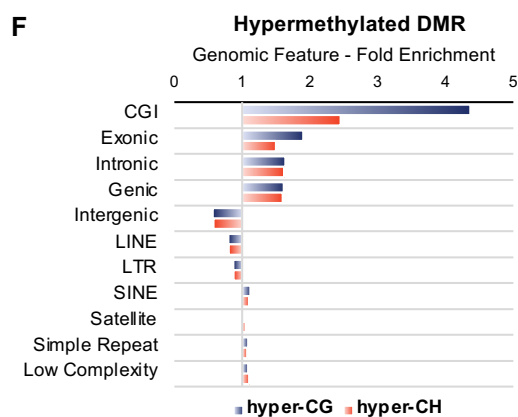

Supplement: NIHMS1878535-supplement-5.pdf [file NIHMS1878535-supplement-5.pdf]

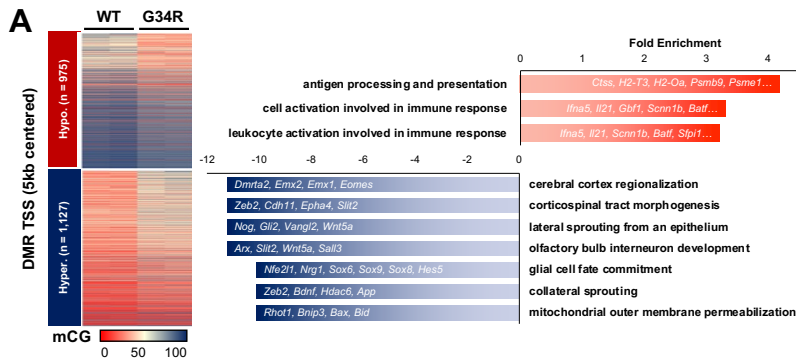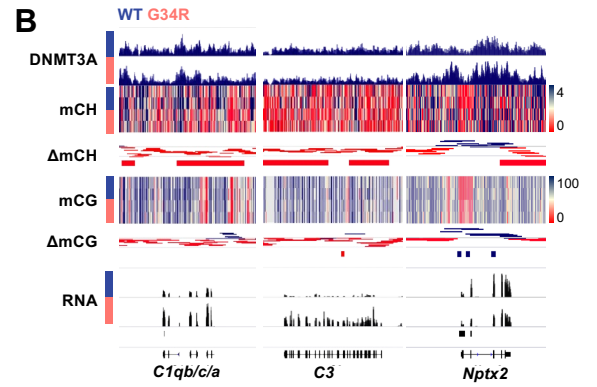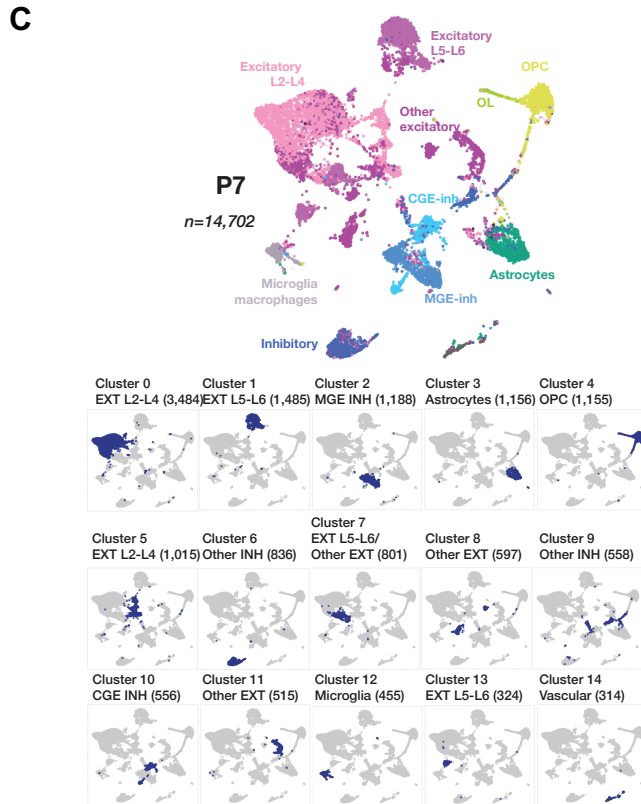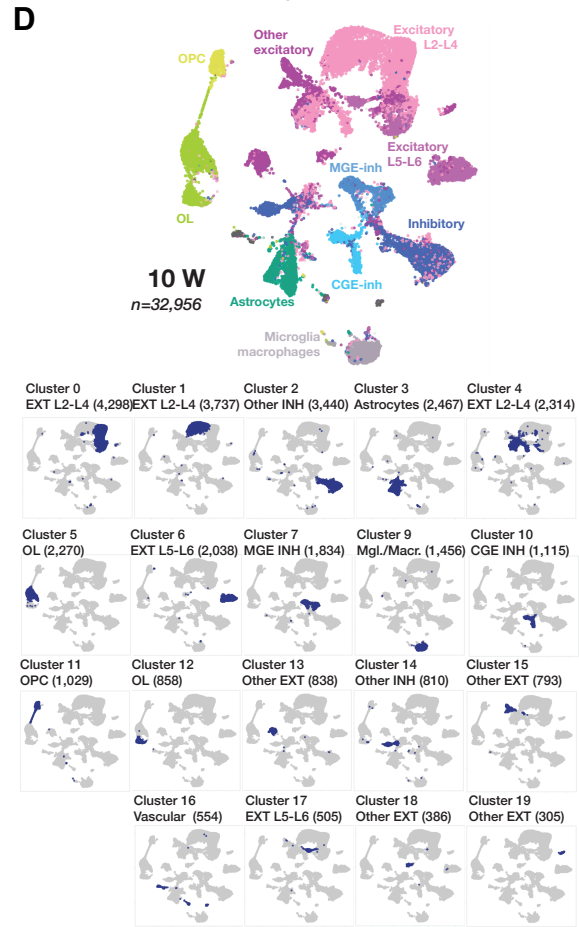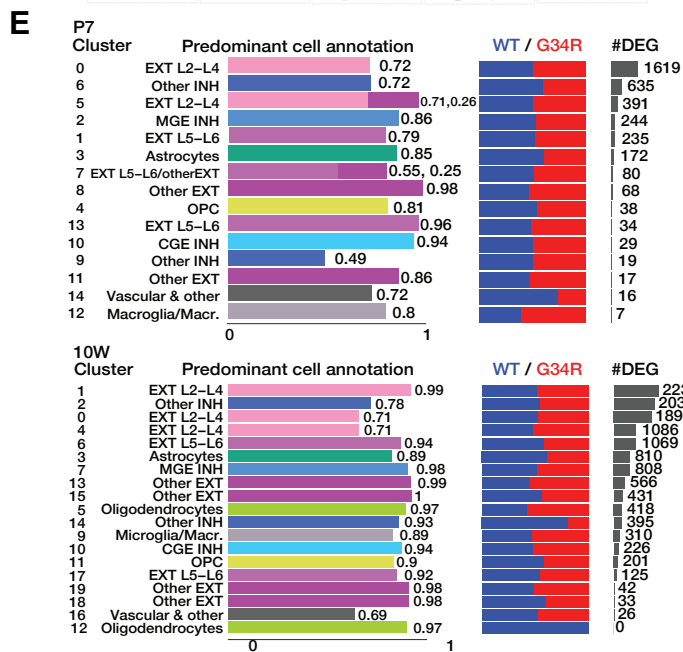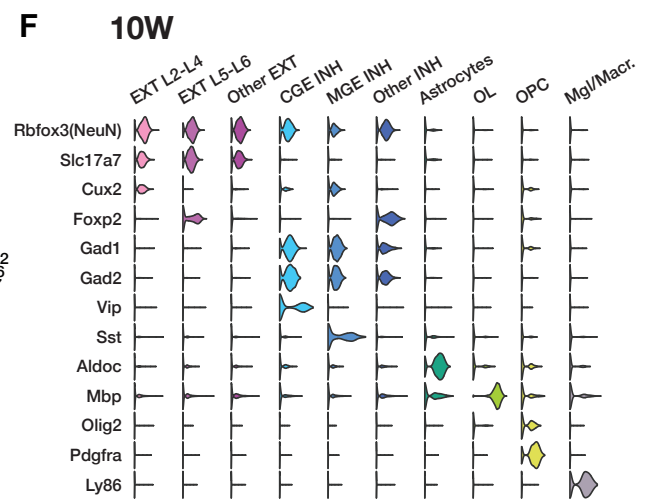

Supplement: NIHMS1878535-supplement-6.pdf [file NIHMS1878535-supplement-6.pdf]
